# Supplementary material
Source: PubMed Central journal article supplement (PMC6570621)

In the format provided by the authors and unedited.

# Mitochondrial double-stranded RNA triggers antiviral signalling in humans

Ashish Dhir<sup>1\*</sup>, Somdutta Dhir<sup>1,12</sup>, Lukasz S. Borowski<sup>2,3,12</sup>, Laura Jimenez<sup>4</sup>, Michael Teitell<sup>4</sup>, Agnès Rötig<sup>5</sup>, Yanick J. Crow<sup>5,6,7</sup>, Gillian I. Rice<sup>8</sup>, Darragh Duffy<sup>9,10</sup>, Christelle Tamby<sup>5</sup>, Takayuki Nojima<sup>1</sup>, Arnold Munnich<sup>5</sup>, Manuel Schiff<sup>5</sup>, Claudia Ribeiro de Almeida<sup>1</sup>, Jan Rehwinkel<sup>11</sup>, Andrzej Dziembowski<sup>2,3</sup>, Roman J. Szczesny<sup>2,3\*</sup> & Nicholas J. Proudfoot<sup>1\*</sup>

<sup>1</sup>Sir William Dunn School of Pathology, University of Oxford, Oxford, UK. <sup>2</sup>Institute of Biochemistry and Biophysics, Polish Academy of Sciences, Warsaw, Poland. <sup>3</sup>Faculty of Biology, University of Warsaw, Warsaw, Poland. <sup>4</sup>Department of Pathology and Laboratory Medicine, University of California, Los Angeles, Los Angeles, CA, USA. <sup>5</sup>INSERM UMR1163, Institut Imagine, Paris, France. <sup>6</sup>Paris Descartes University, Sorbonne-Paris-Cité, Institut Imagine, Paris, France. <sup>7</sup>Centre for Genomic and Experimental Medicine, MRC Institute of Genetics and Molecular Medicine, University of Edinburgh, Edinburgh, UK. <sup>8</sup>Division of Evolution and Genomic Sciences, School of Biological Sciences, Faculty of Biology, Medicine and Health, University of Manchester, Manchester, UK. <sup>9</sup>Immunobiology of Dendritic Cells, Institut Pasteur, Paris, France. <sup>10</sup>INSERM U1223, Paris, France. <sup>11</sup>MRC Human Immunology Unit, MRC Weatherall Institute of Molecular Medicine, Radcliffe Department of Medicine, University of Oxford, Oxford, UK. <sup>12</sup>These authors contributed equally: Somdutta Dhir, Lukasz S. Borowski. \*e-mail: ashish.dhir@path.ox.ac.uk; rszczesny@ibb.waw.pl; nicholas.proudfoot@path.ox.ac.uk

Figure1e ED Figure 3c

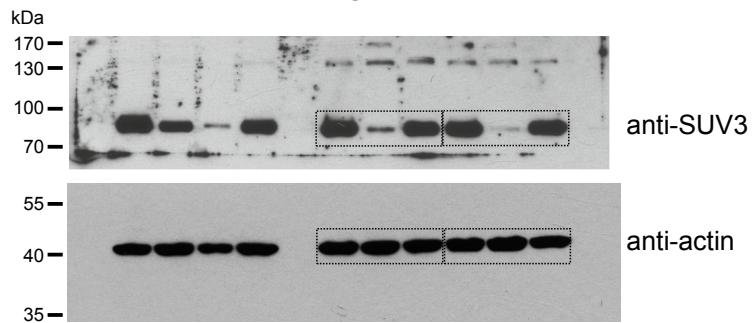

Figure1e ED Figure 3c

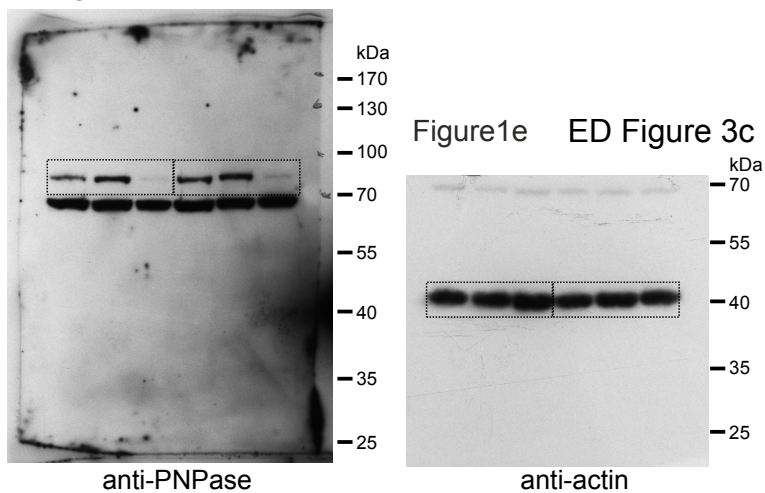

ED Figure 4b

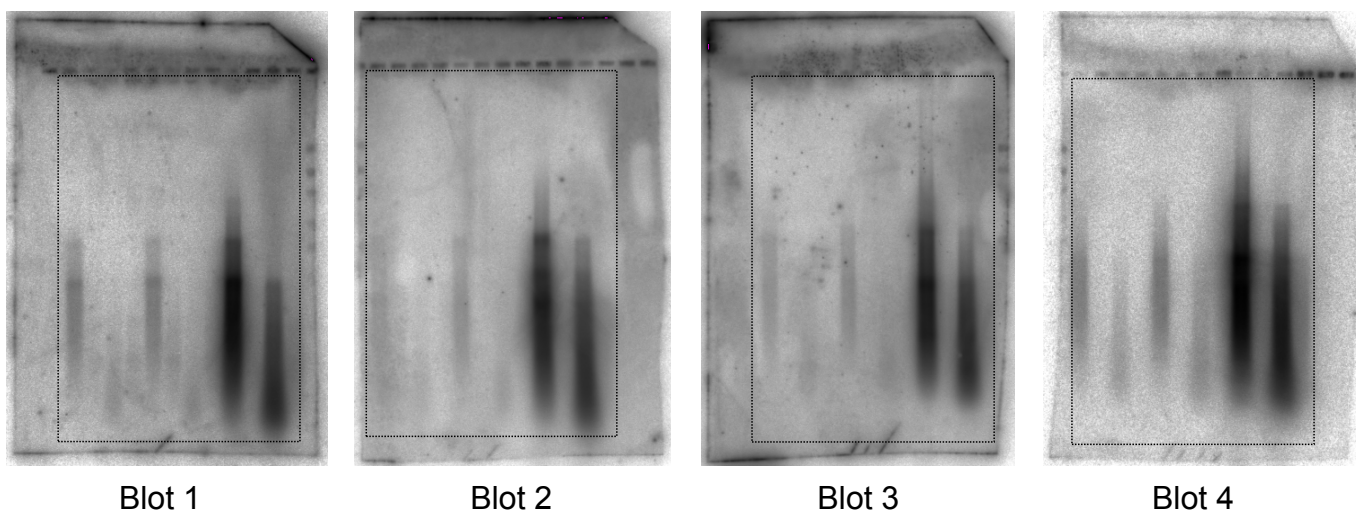

ED Figure 5c

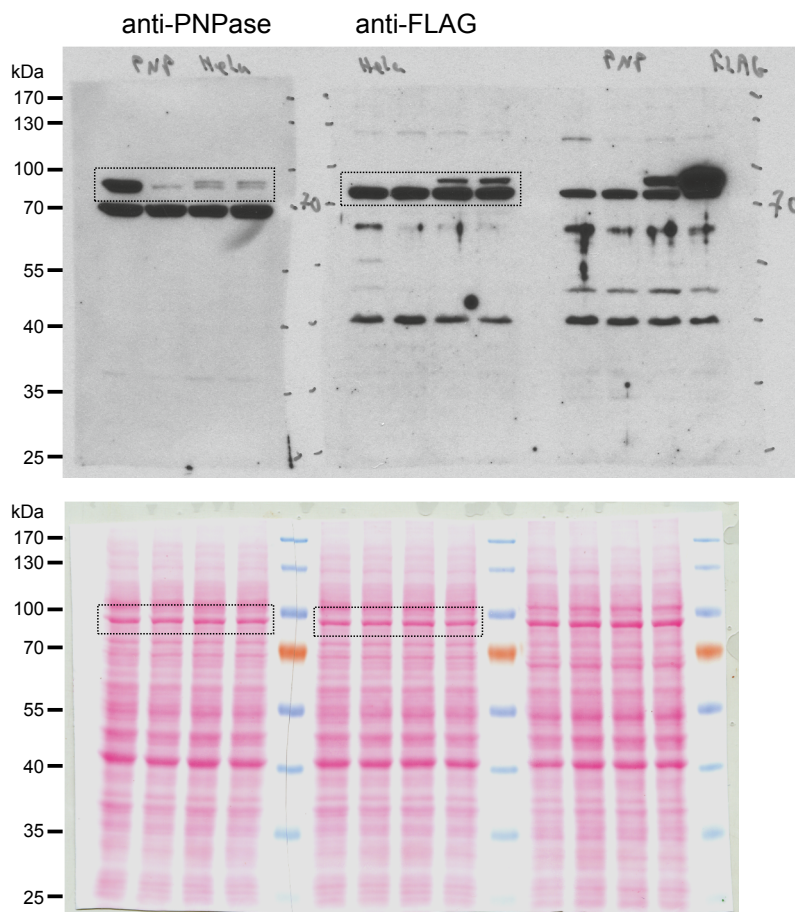

Figure 3b

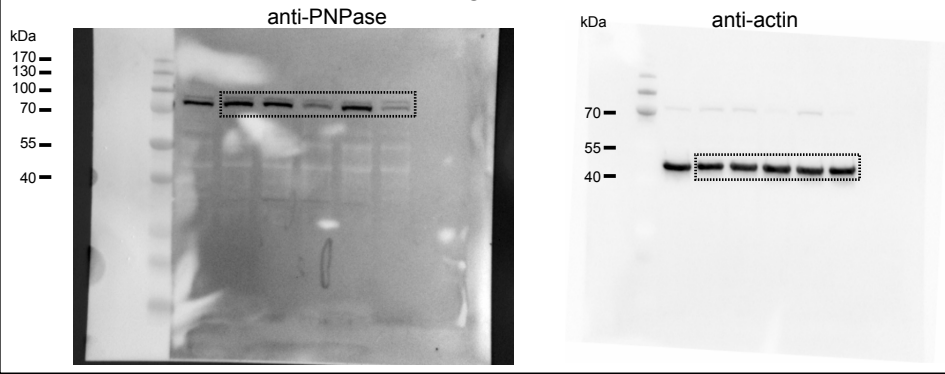

Figure 3d

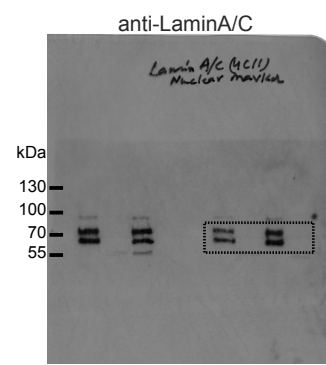

Figure 3d

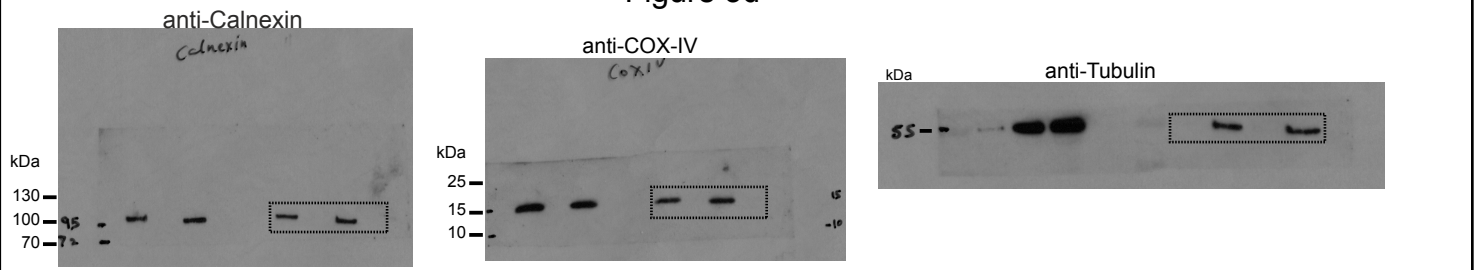

Figure 4c

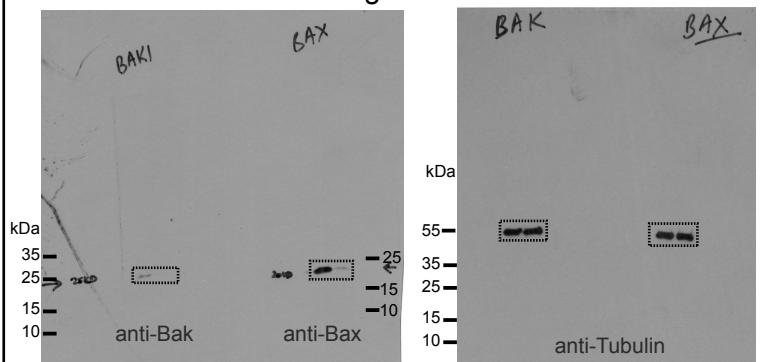

ExtendedDataFigure7c

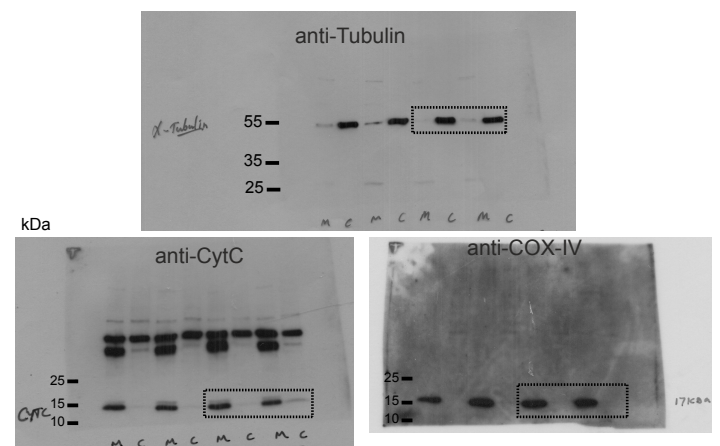

ExtendedDataFigure8a

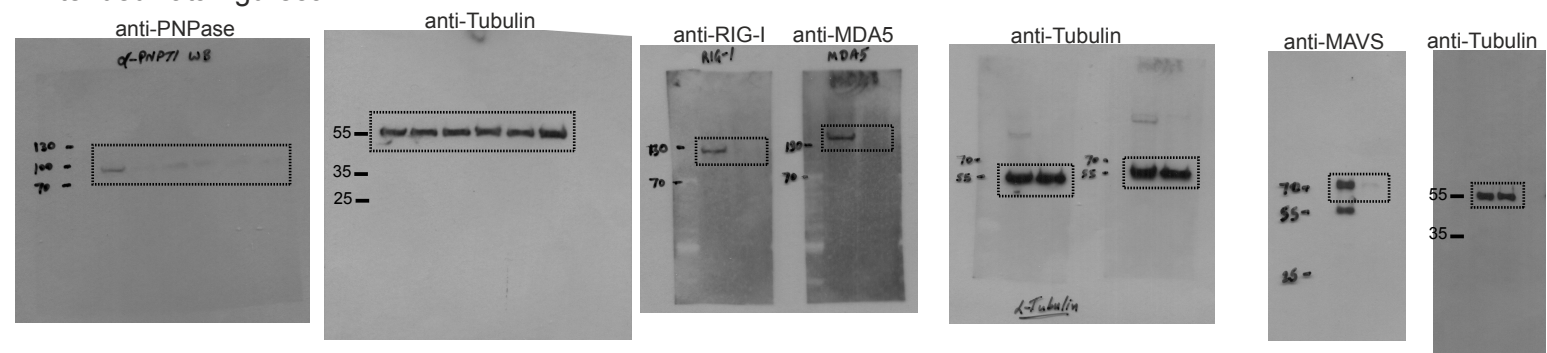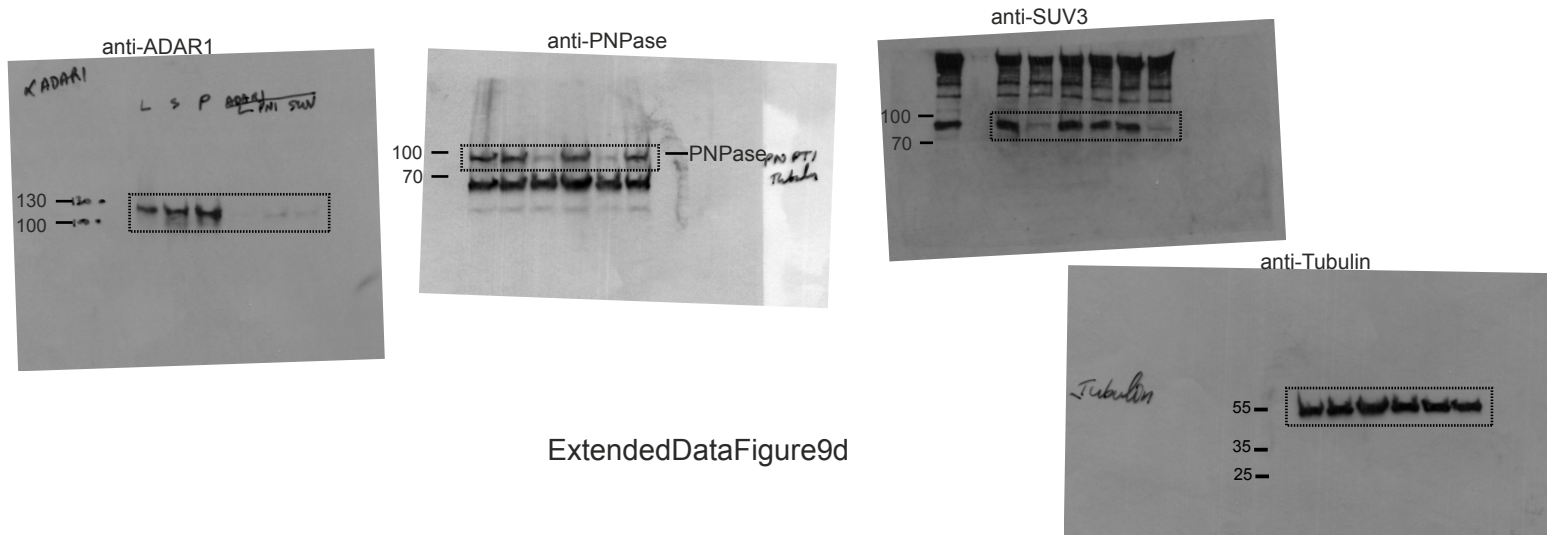

ExtendedDataFigure9d

Extended Data Figure 1e

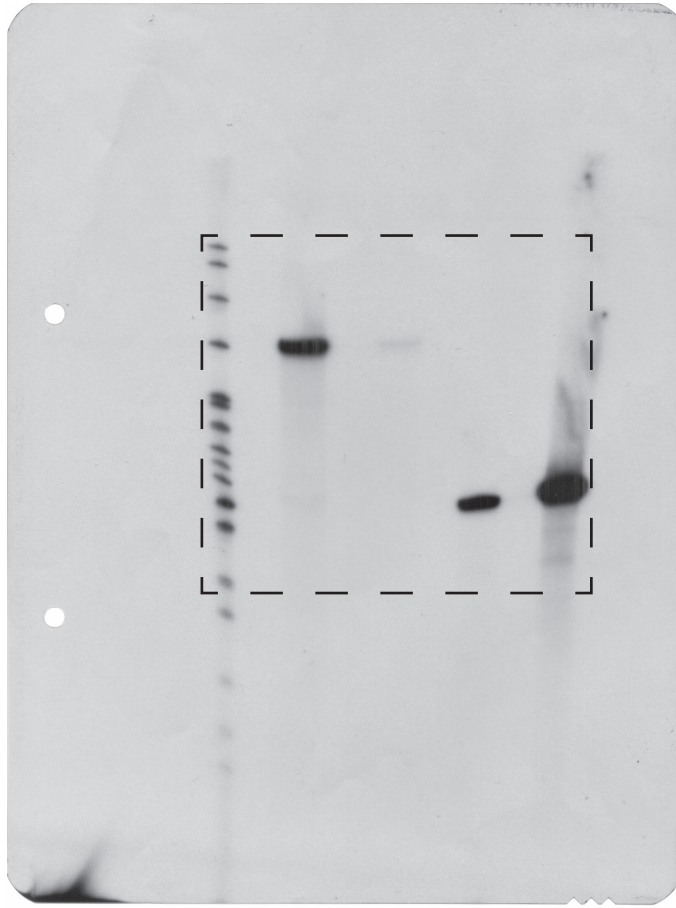

Supplement: EMS83334-supplement-Supplementary_Figures.pdf [file EMS83334-supplement-Supplementary_Figures.pdf]
